# Supplementary material for: Calculations of helium separation via uniform pores of stanene-based membranes
Source: publisher site journal article supplement (doi:10.3762/bjnano.6.256), 2015-12-23
Supplement: Additional file 1 [file 2190-4286-6-256-S1.pdf]

# **Supporting Information**

**for**

## **Helium separation via uniform pores of stanene-based membranes**

Guoping Gao<sup>1</sup>, Yan Jiao<sup>2</sup>, Yalong Jiao<sup>1</sup>, Fengxian Ma<sup>1</sup>, Liangzhi Kou<sup>1</sup> and Aijun Du<sup>1,\*</sup>

Address: <sup>1</sup>School of Chemistry, Physics and Mechanical Engineering, Queensland University of Technology, Garden Point Campus, Brisbane QLD 4001, Australia, and <sup>2</sup>School of Chemical Engineering, University of Adelaide, Adelaide SA 5005, Australia

Email: Aijun Du - [aijun.du@qut.edu.au](mailto:aijun.du@qut.edu.au)

\* Corresponding author

# The phonon dispersion spectrum and stress–strain curves of Sn, SnH and SnF lattices

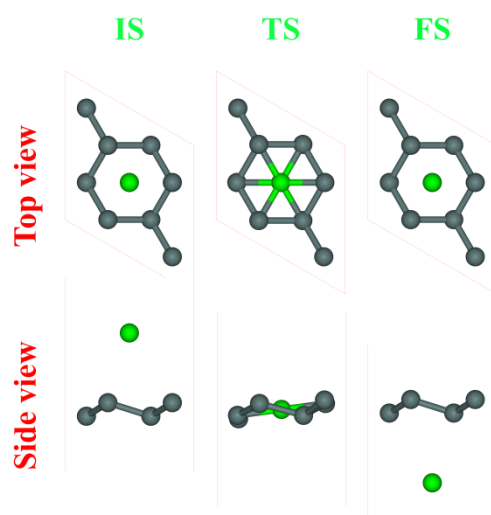

**Figure S1:** The initial, transition, and final geometries of He penetrating through 2D Sn. Color code: grey, Sn; green, He.

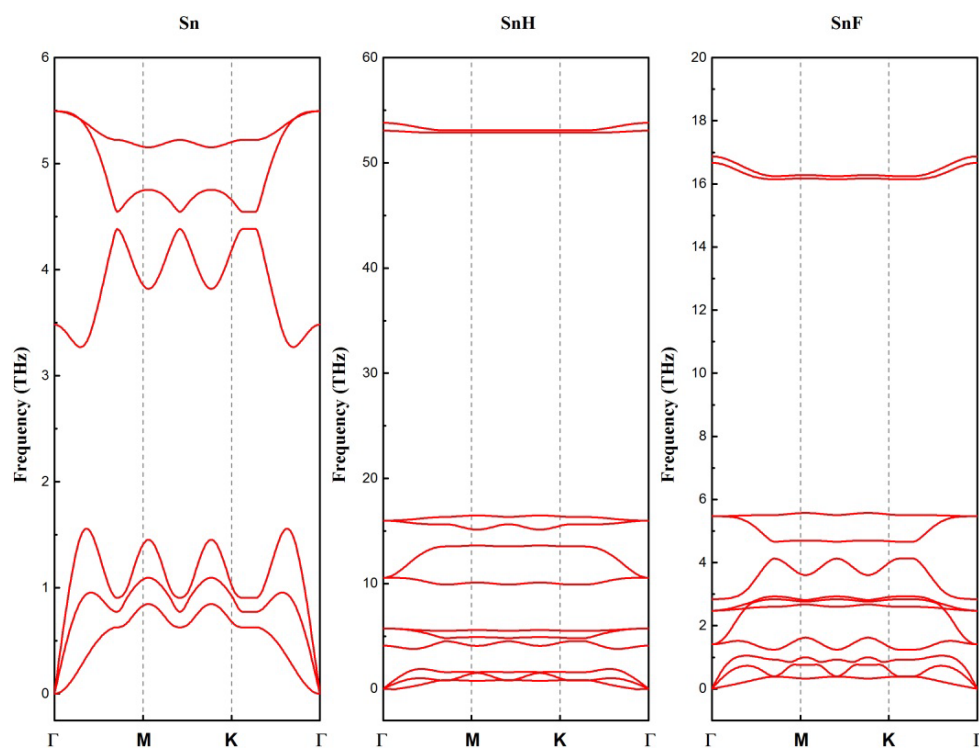

**Figure S2:** The phonon dispersion spectrum of Sn, SnH and SnF.

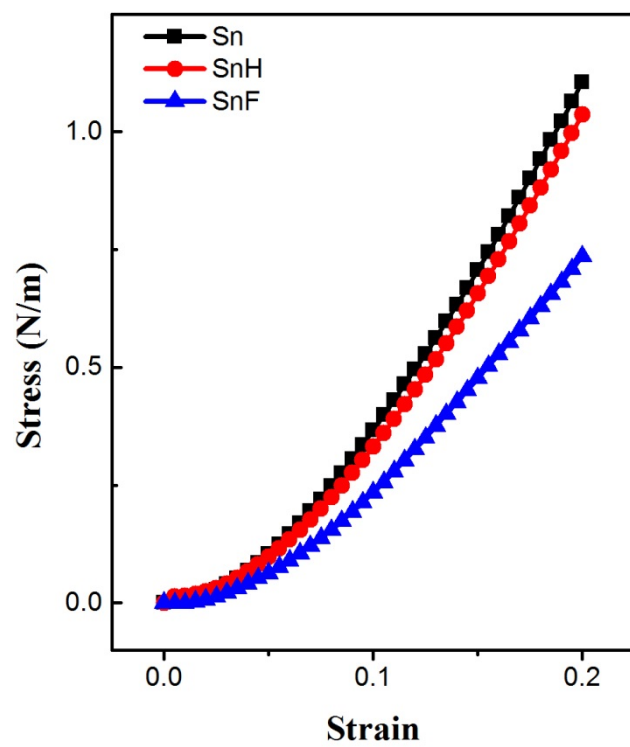

**Figure S3:** The stress–strain curves for Sn, SnH and SnF membranes.
